# Supplementary material for: Agalsidase alfa versus agalsidase beta for the treatment of Fabry disease: an international cohort study
Source: PubMed Central journal article supplement — J Med Genet. 2018 Feb 7;55(5):351–8. doi: 10.1136/jmedgenet-2017-104863 (PMC5931248; doi:10.1136/jmedgenet-2017-104863), 2018-02-07
Supplement: jmedgenet-2017-104863supp004.pdf [file jmedgenet-2017-104863supp004.pdf]

**S2 Table Mutations and phenotypes**

| Mutations                    | Total | Men       |               | Women     |               |
|------------------------------|-------|-----------|---------------|-----------|---------------|
|                              |       | classical | non-classical | classical | non-classical |
| c.35_47del13                 | 1     | 1         | 0             | 0         | 0             |
| c.358-6                      | 1     | 1         | 0             | 0         | 0             |
| c.369+5G>T                   | 1     | 0         | 1             | 0         | 0             |
| c.370-533_c.1277<br>del4.5kb | 2     | 0         | 0             | 2         | 0             |
| c.548-1G>A                   | 1     | 0         | 0             | 1         | 0             |
| c.639+919 G>A                | 2     | 0         | 2             | 0         | 0             |
| c.640-2A>C                   | 2     | 0         | 0             | 2         | 0             |
| c.748_IVS6+8del62            | 1     | 1         | 0             | 0         | 0             |
| c.802-3_802-2delCA           | 1     | 1         | 0             | 0         | 0             |
| c.1000-2 A>G                 | 2     | 1         | 0             | 1         | 0             |
| duplication exon 3+4         | 1     | 1         | 0             | 0         | 0             |
| exon 1 deletion              | 3     | 2         | 0             | 1         | 0             |
| IVS2+1G>A                    | 1     | 1         | 0             | 0         | 0             |
| IVS3+1G>A                    | 4     | 3         | 0             | 0         | 1             |
| IVS4+1G>A                    | 1     | 0         | 0             | 1         | 0             |
| IVS5-3_2delCA                | 1     | 0         | 0             | 1         | 0             |
| IVS6-10G>A                   | 1     | 1         | 0             | 0         | 0             |
| IVS6-2A>T                    | 1     | 0         | 0             | 1         | 0             |
| p.Ala135Val                  | 2     | 1         | 0             | 1         | 0             |
| p.Ala143Pro                  | 26    | 7         | 0             | 19        | 0             |
| p.Ala143Thr                  | 2     | 1         | 0             | 1         | 0             |
| p.Ala156ProFS*9              | 2     | 1         | 0             | 0         | 1             |
| p.Ala156Thr                  | 1     | 0         | 0             | 1         | 0             |
| p.Ala257Ser                  | 1     | 1         | 0             | 0         | 0             |
| p.Ala285Asp                  | 5     | 0         | 2             | 3         | 0             |
| p.Ala309Pro                  | 2     | 0         | 0             | 1         | 1             |
| p.Ala31Val                   | 1     | 0         | 0             | 1         | 0             |
| p.Ala348Pro                  | 2     | 1         | 0             | 1         | 0             |
| p.Arg112Cys                  | 5     | 5         | 0             | 0         | 0             |
| p.Arg112His                  | 4     | 0         | 3             | 0         | 1             |
| p.Arg220*                    | 10    | 5         | 0             | 5         | 0             |
| p.Arg227*                    | 18    | 8         | 0             | 8         | 2             |
| p.Arg227Gln                  | 2     | 2         | 0             | 0         | 0             |
| p.Arg301*                    | 4     | 2         | 0             | 2         | 0             |
| p.Arg301Gln                  | 4     | 0         | 2             | 0         | 2             |
| p.Arg301Pro                  | 1     | 1         | 0             | 0         | 0             |
| p.Arg332Lys Fs*7             | 4     | 2         | 0             | 2         | 0             |
| p.Arg342*                    | 8     | 4         | 0             | 4         | 0             |
| p.Arg342Gln                  | 13    | 6         | 0             | 7         | 0             |
| p.Arg342Leu                  | 4     | 2         | 0             | 2         | 0             |
| p.Arg363Cys                  | 1     | 0         | 1             | 0         | 0             |
| p.Arg49Cys                   | 1     | 1         | 0             | 0         | 0             |
| p.Arg49Leu                   | 2     | 2         | 0             | 0         | 0             |
| p.Asn215Ser                  | 49    | 2         | 33            | 0         | 14            |
| p.Asn224Gly                  | 1     | 0         | 0             | 1         | 0             |
| p.Asn298Ser                  | 1     | 0         | 1             | 0         | 0             |
| p.Asn33Asp                   | 1     | 1         | 0             | 0         | 0             |
| p.Asn34Lys fs*22             | 1     | 0         | 0             | 1         | 0             |
| p.Asn355_Ile359del           | 1     | 0         | 0             | 1         | 0             |

|                   |   |   |   |   |   |
|-------------------|---|---|---|---|---|
| p.Asn408Ile fs*10 | 4 | 1 | 0 | 1 | 2 |
| p.Asn53Leu fs*57  | 2 | 1 | 0 | 1 | 0 |
| p.Asp136Glu       | 2 | 1 | 0 | 0 | 1 |
| p.Asp136Tyr       | 7 | 4 | 0 | 2 | 1 |
| p.Asp165Val       | 1 | 1 | 0 | 0 | 0 |
| p.Asp170Asn       | 1 | 1 | 0 | 0 | 0 |
| p.Asp234del       | 1 | 0 | 0 | 1 | 0 |
| p.Asp299Glu       | 1 | 0 | 1 | 0 | 0 |
| p.Asp55Thr fs*66  | 1 | 1 | 0 | 0 | 0 |
| p.Cys174Val fs*4  | 6 | 1 | 0 | 5 | 0 |
| p.Cys202Trp       | 1 | 0 | 0 | 1 | 0 |
| p.Cys63Ala        | 1 | 1 | 0 | 0 | 0 |
| p.Gln386*         | 3 | 0 | 0 | 3 | 0 |
| p.Gln107*         | 1 | 0 | 0 | 0 | 1 |
| p.Gln280His       | 2 | 1 | 0 | 0 | 1 |
| p.Gln312*         | 1 | 0 | 0 | 1 | 0 |
| p.Gln321_Asp322   | 1 | 1 | 0 | 0 | 0 |
| DellnsHisAsn      | 1 | 1 | 0 | 0 | 0 |
| p.Gln321Leu       | 2 | 0 | 1 | 1 | 0 |
| p.Gln386*         | 2 | 1 | 0 | 1 | 0 |
| p.Gln416*         | 2 | 1 | 0 | 0 | 1 |
| p.Glu338Lys       | 3 | 0 | 0 | 1 | 2 |
| p.Glu341Lys       | 2 | 2 | 0 | 0 | 0 |
| p.Glu358Asp fs*16 | 3 | 0 | 0 | 2 | 1 |
| p.Gly132Glu       | 1 | 1 | 0 | 0 | 0 |
| p.Gly183Asp       | 2 | 1 | 0 | 0 | 1 |
| p.Gly260Glu       | 1 | 1 | 0 | 0 | 0 |
| p.Gly261Val       | 1 | 1 | 0 | 0 | 0 |
| p.Gly325Ala fs*23 | 2 | 1 | 0 | 1 | 0 |
| p.Gly325Ser       | 2 | 0 | 1 | 0 | 1 |
| p.Gly35Arg        | 2 | 1 | 0 | 0 | 1 |
| p.Gly361Arg       | 4 | 3 | 0 | 1 | 0 |
| p.Gly373Asp       | 2 | 1 | 0 | 1 | 0 |
| p.Gly375Glu fs    | 2 | 2 | 0 | 0 | 0 |
| p.Gly43Val        | 1 | 0 | 0 | 1 | 0 |
| p.Ile232Thr       | 1 | 0 | 1 | 0 | 0 |
| p.Ile253Leu fs*16 | 1 | 1 | 0 | 0 | 0 |
| p.Ile317Thr       | 7 | 2 | 0 | 3 | 2 |
| p.Ile319Leu fs*10 | 3 | 2 | 0 | 1 | 0 |
| p.Ile319Thr       | 1 | 0 | 1 | 0 | 0 |
| p.Ile91Thr        | 1 | 0 | 0 | 0 | 1 |
| p.Leu129Pro       | 5 | 3 | 0 | 1 | 1 |
| p.Leu166Pro       | 1 | 0 | 1 | 0 | 0 |
| p.Leu166Ser       | 1 | 0 | 0 | 1 | 0 |
| p.Leu21Pro        | 2 | 0 | 0 | 1 | 1 |
| p.Leu268Ser       | 1 | 1 | 0 | 0 | 0 |
| p.Leu311Val       | 1 | 1 | 0 | 0 | 0 |
| p.Leu347Phe fs*28 | 2 | 0 | 0 | 1 | 1 |
| p.Leu372Pro       | 2 | 1 | 0 | 1 | 0 |
| p.Leu403*         | 2 | 2 | 0 | 0 | 0 |
| p.Leu414Ser       | 1 | 0 | 0 | 1 | 0 |
| p.Leu54Pro        | 1 | 0 | 1 | 0 | 0 |
| p.Lys240Gly FS*9  | 4 | 2 | 0 | 2 | 0 |
| p.Met187Ser FS*5  | 1 | 1 | 0 | 0 | 0 |
| p.Met187Val       | 1 | 0 | 0 | 0 | 1 |
| p.Met1Thr         | 2 | 2 | 0 | 0 | 0 |
| p.Met42Val        | 2 | 1 | 0 | 1 | 0 |

|                   |    |   |   |   |   |
|-------------------|----|---|---|---|---|
| p.Met72Arg        | 1  | 1 | 0 | 0 | 0 |
| p.Phe169Ser       | 1  | 0 | 0 | 1 | 0 |
| p.Phe18Ser        | 5  | 0 | 0 | 4 | 1 |
| p.Pro205Thr       | 10 | 3 | 0 | 5 | 2 |
| p.Pro293His       | 1  | 0 | 0 | 0 | 1 |
| p.Pro293Leu       | 2  | 1 | 0 | 0 | 1 |
| p.Pro389Ala       | 4  | 0 | 2 | 0 | 2 |
| p.Pro409Thr       | 2  | 0 | 0 | 0 | 2 |
| p.Ser126Gly       | 1  | 0 | 0 | 0 | 1 |
| p.Ser345Arg fs*29 | 1  | 1 | 0 | 0 | 0 |
| p.Ser345Pro       | 6  | 1 | 1 | 4 | 0 |
| p.Thr282Ile       | 2  | 2 | 0 | 0 | 0 |
| p.Thr410Ile       | 2  | 0 | 0 | 2 | 0 |
| p.Trp204*         | 1  | 1 | 0 | 0 | 0 |
| p.Trp204Cys       | 1  | 0 | 0 | 0 | 1 |
| p.Trp209*         | 1  | 1 | 0 | 0 | 0 |
| p.Trp226*         | 3  | 2 | 0 | 1 | 0 |
| p.Trp236Cys       | 2  | 1 | 0 | 1 | 0 |
| p.Trp236Leu       | 1  | 0 | 0 | 1 | 0 |
| p.Trp277*         | 1  | 1 | 0 | 0 | 0 |
| p.Trp349*         | 5  | 2 | 0 | 2 | 1 |
| p.Trp399*         | 2  | 2 | 0 | 0 | 0 |
| p.Trp47Gly        | 1  | 0 | 0 | 1 | 0 |
| p.Trp81Ser        | 1  | 1 | 0 | 0 | 0 |
| p.Tyr134fs*1      | 1  | 0 | 0 | 1 | 0 |
| p.Tyr134Ser       | 1  | 0 | 0 | 1 | 0 |
| p.Tyr184*         | 2  | 0 | 0 | 2 | 0 |
| p.Tyr207fs        | 1  | 0 | 0 | 1 | 0 |
| p.Val269Ala       | 3  | 1 | 0 | 2 | 0 |
| p.Val316Glu       | 2  | 1 | 0 | 0 | 1 |
